# Supplementary material
Source: Springer Nature journal article supplement (https://www.springermedizin.de/resource/supplementary/12899_2009_148_MOESM2_ESM.pdf/9514560)

# TRPV5/6

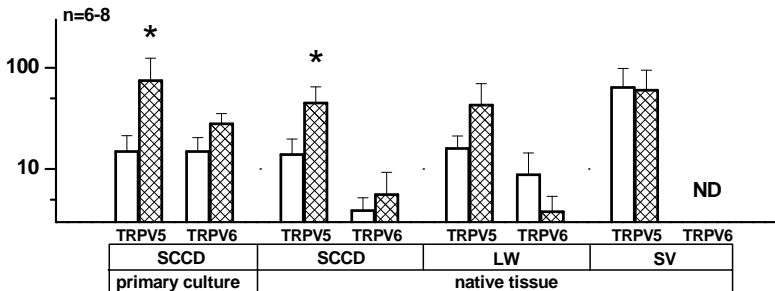

# Calbindin

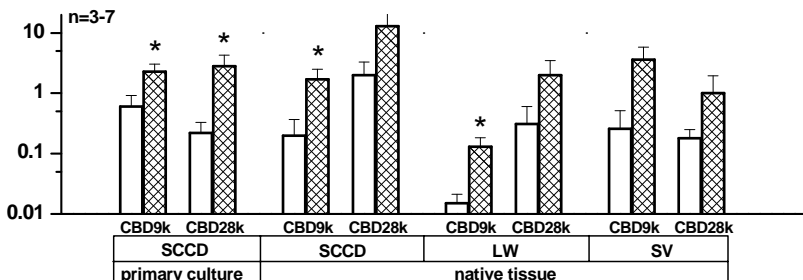

# NCX

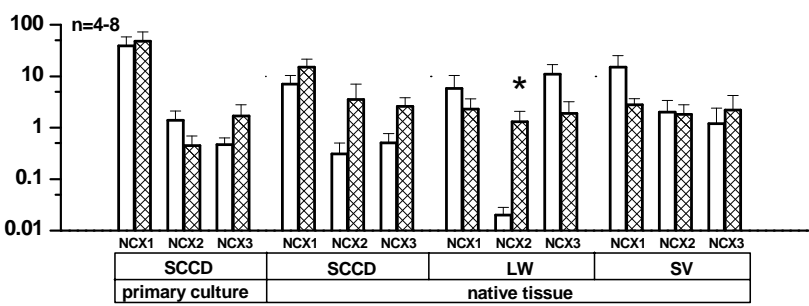

# PMCA

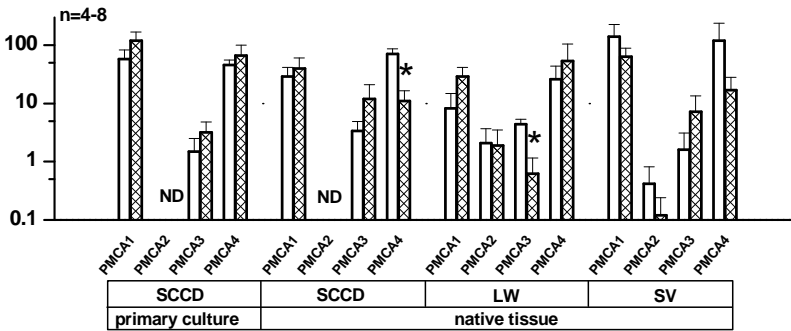

# VDR

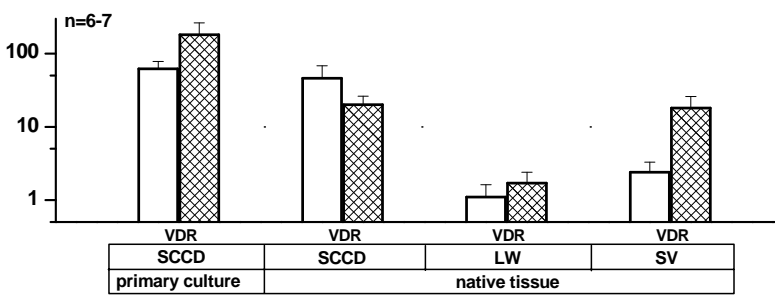

Ratio (gene / 10,000 x 18S)

Supplement: MOESM2 [file 9514560]
